# Supplementary material
Source: publisher figshare collection journal article supplement (https://plos.figshare.com/ndownloader/files/16220699)
Supplement: Supplementary file [file 16220699]

**VADU HEALTH AND DEMOGRAPHIC SURVEILLANCE SYSTEM, (VADU HDSS)  
VADU RURAL HEALTH PROGRAM, K.E.M HOSPITAL RESEARCH CENTRE, PUNE  
BIRTH EVENT FORM**

|                                                                                                                                                                                                                                                                                                                                                                                                                                                                                                                                                    |                                                                                                                                                                                                                                                                                                                                                                                                                                                                                                                                                    |                                                                                                                                                                                                                                                                                                                                             |
|----------------------------------------------------------------------------------------------------------------------------------------------------------------------------------------------------------------------------------------------------------------------------------------------------------------------------------------------------------------------------------------------------------------------------------------------------------------------------------------------------------------------------------------------------|----------------------------------------------------------------------------------------------------------------------------------------------------------------------------------------------------------------------------------------------------------------------------------------------------------------------------------------------------------------------------------------------------------------------------------------------------------------------------------------------------------------------------------------------------|---------------------------------------------------------------------------------------------------------------------------------------------------------------------------------------------------------------------------------------------------------------------------------------------------------------------------------------------|
| Starting time of the interview: <input type="text"/> <input type="text"/> : <input type="text"/> <input type="text"/>                                                                                                                                                                                                                                                                                                                                                                                                                              |                                                                                                                                                                                                                                                                                                                                                                                                                                                                                                                                                    |                                                                                                                                                                                                                                                                                                                                             |
| Interviewer Name : _____                                                                                                                                                                                                                                                                                                                                                                                                                                                                                                                           |                                                                                                                                                                                                                                                                                                                                                                                                                                                                                                                                                    |                                                                                                                                                                                                                                                                                                                                             |
| Signature: _____ Date <input type="text"/> <input type="text"/> / <input type="text"/> <input type="text"/> / <input type="text"/> <input type="text"/> <input type="text"/> <input type="text"/>                                                                                                                                                                                                                                                                                                                                                  |                                                                                                                                                                                                                                                                                                                                                                                                                                                                                                                                                    |                                                                                                                                                                                                                                                                                                                                             |
| PID                                                                                                                                                                                                                                                                                                                                                                                                                                                                                                                                                | CID                                                                                                                                                                                                                                                                                                                                                                                                                                                                                                                                                |                                                                                                                                                                                                                                                                                                                                             |
| Foetus <input type="text"/> <input type="text"/><br>Mother <input type="text"/> <input type="text"/><br>Father <input type="text"/> | Foetus <input type="text"/> <input type="text"/><br>Mother <input type="text"/> <input type="text"/><br>Father <input type="text"/> |                                                                                                                                                                                                                                                                                                                                             |
| Q0001                                                                                                                                                                                                                                                                                                                                                                                                                                                                                                                                              | Household Number<br><i>(Record the HH No. Where the mother belongs)</i>                                                                                                                                                                                                                                                                                                                                                                                                                                                                            | <input type="text"/> <input type="text"/> <input type="text"/> <input type="text"/> <input type="text"/> <input type="text"/><br>Village                  Wadi                  Household Number                                                                                                                                            |
| Q0002                                                                                                                                                                                                                                                                                                                                                                                                                                                                                                                                              | Name of the head of household<br>(of above mentioned household)<br>Village Name<br><br>Wadi Name<br><br>Landmark<br><br>Phone Number                                                                                                                                                                                                                                                                                                                                                                                                               | _____<br>_____<br>_____<br>_____                                                                                                                                                                                                                                                                                                            |
| Q0003                                                                                                                                                                                                                                                                                                                                                                                                                                                                                                                                              | What is the relationship of child with head of the household?                                                                                                                                                                                                                                                                                                                                                                                                                                                                                      | 01 Self<br>02 <del>Spouse (wife/husband)</del><br>03 Son/daughter<br>04 Daughter/son-in-laws<br>05 Grandson/daughter<br>06 <del>Mother/father</del><br>07 Father/mother-in-laws<br>08 Brother/sister<br>09 <del>Step wife</del><br>10 <del>Grandmother/ father</del><br>11 Other relationship ( <i>Specify</i> )<br>_____<br>12 No relation |
| Q0004                                                                                                                                                                                                                                                                                                                                                                                                                                                                                                                                              | Name of the Respondent ( <i>Respondent should be head of the household or preferably the adult member of the house</i> )                                                                                                                                                                                                                                                                                                                                                                                                                           | _____<br>_____                                                                                                                                                                                                                                                                                                                              |

**VADU HEALTH AND DEMOGRAPHIC SURVEILLANCE SYSTEM, (VADU HDSS)  
VADU RURAL HEALTH PROGRAM, K.E.M HOSPITAL RESEARCH CENTRE, PUNE  
BIRTH EVENT FORM**

|        |                                                                                                   |                                                                                                                                                                             |
|--------|---------------------------------------------------------------------------------------------------|-----------------------------------------------------------------------------------------------------------------------------------------------------------------------------|
| Q0005  | Date of Birth of the child                                                                        | <input type="text"/> <input type="text"/> / <input type="text"/> <input type="text"/> / <input type="text"/> <input type="text"/> <input type="text"/> <input type="text"/> |
| Q0006  | Type of birth                                                                                     | 01 Live birth<br>02 Still birth (If answer is 02 then don't ask Question -009,015,016,017,018,019)                                                                          |
| Q0007  | Sex of the child                                                                                  | 01 Male<br>02 Female                                                                                                                                                        |
| Q0008  | Birth is registered at                                                                            | 01 Gram Panchayat<br>02 Corporation<br>03 Others (Specify) _____<br>04 So far not registered                                                                                |
| Q0009  | Name of the child (do not ask for stillbirth)                                                     | _____                                                                                                                                                                       |
| Q0009a | Name of the mother of the child                                                                   | _____                                                                                                                                                                       |
| Q0009b | Name of the father of the child                                                                   | _____                                                                                                                                                                       |
| Q0010  | Permanent address of child's mother (If she is from other than Vadu study area)                   | _____                                                                                                                                                                       |
| Q0011  | Number of births in Present / current delivery?                                                   | 01 First<br>02 Second<br>03 Third                                                                                                                                           |
| Q0012  | Place of delivery                                                                                 | 01 Government hospital<br>02 Private hospital<br>03 Home<br>04 In transit towards hospital<br>05 Other (specify) _____                                                      |
| Q0013  | Who assists during the labor?                                                                     | 01 Trained Dai<br>02 Untrained Dai<br>03 Doctor<br>04 Nurse<br>05 Others (specify) _____                                                                                    |
| Q0014  | Order of present birth (only live birth) (include if the child died immediately after live birth) | <input type="text"/> <input type="text"/>                                                                                                                                   |
| Q0015  | Did the baby cry immediately after birth?                                                         | 01 Yes<br>02 NO                                                                                                                                                             |

**VADU HEALTH AND DEMOGRAPHIC SURVEILLANCE SYSTEM, (VADU HDSS)  
VADU RURAL HEALTH PROGRAM, K.E.M HOSPITAL RESEARCH CENTRE, PUNE  
BIRTH EVENT FORM**

|       |                                                                                                                  |                                                                                                                                                                                                                                                                                                                                                                                                                                                                                                                                                                                                                                                            |
|-------|------------------------------------------------------------------------------------------------------------------|------------------------------------------------------------------------------------------------------------------------------------------------------------------------------------------------------------------------------------------------------------------------------------------------------------------------------------------------------------------------------------------------------------------------------------------------------------------------------------------------------------------------------------------------------------------------------------------------------------------------------------------------------------|
| Q0016 | When did you start breastfeeding?                                                                                | 01. Within first six hours<br>02. 6- 14 hours<br>03. 24- 48 hours<br>04. 48-72hours<br>05. After 72 hours of delivery<br>06. Never breastfeed so far (specify the reason)_____                                                                                                                                                                                                                                                                                                                                                                                                                                                                             |
| Q0017 | Did you give colostrum to this child?                                                                            | 01 Yes<br>02 NO                                                                                                                                                                                                                                                                                                                                                                                                                                                                                                                                                                                                                                            |
| Q0018 | Did you feed anything else other than breastfeed to the baby in first 72 hours of birth?<br>If Yes, what is that | 01 Yes<br>02 NO<br><hr/>                                                                                                                                                                                                                                                                                                                                                                                                                                                                                                                                                                                                                                   |
| Q0019 | Weight of the child at the time of delivery?                                                                     | <div style="display: flex; align-items: center; gap: 10px;"> <div style="border: 1px solid black; width: 20px; height: 20px; display: flex; align-items: center; justify-content: center;"> </div> <div style="border: 1px solid black; width: 20px; height: 20px; display: flex; align-items: center; justify-content: center;"> </div> <div style="border: 1px solid black; width: 20px; height: 20px; display: flex; align-items: center; justify-content: center;"> </div> <div style="border: 1px solid black; width: 20px; height: 20px; display: flex; align-items: center; justify-content: center;"> </div> <div>Grams</div> </div> 88 Don't Know |

End time of the interview:  :

Checked by \_\_\_\_\_

Signature: \_\_\_\_\_

Date:  /

Name of the data entry operator: \_\_\_\_\_

Signature : \_\_\_\_\_

Date:  /

BIRTH EVENT FORM, VADU, HDSS, v4, DATED 14<sup>th</sup> Dec.

Page 3 of 3
